# Supplementary material for: Construction of a core–double-shell structured Si@graphene@Al2O3 composite for a high-performance lithium-ion battery anode
Source: Royal Society of Chemistry journal article supplement (doi:10.1039/d2nj04909k), 2023-01-01
Supplement: d2nj04909k1.pdf [file d2nj04909k1.pdf]

## Supplementary Materials

### **Constructing core-double-shell structured Si@graphene@Al<sub>2</sub>O<sub>3</sub> composite for high-performance lithium-ion battery anode**

*Fei Zhou<sup>a</sup>, Zhitong Shang<sup>b</sup>, Xiaoyu Zhao<sup>b</sup>, Qiang Yu<sup>b</sup>, YiChen Mu<sup>a</sup>, Haoran Xu<sup>a</sup>, Xiaojun Tang<sup>a</sup>,*

*Siyuan Huang<sup>a</sup> Xiaocheng Li<sup>b\*</sup>*

*<sup>a</sup>Faculty of Materials Metallurgy and Chemistry, Jiangxi University of Science and Technology,*

*Ganzhou 341000, P.R. China*

*<sup>b</sup> Jiangxi Province Key Laboratory of Power Battery and Materials, Faculty of Materials*

*Metallurgy and Chemistry, Jiangxi University of Science and Technology, Ganzhou 341000, P.R.*

*China*

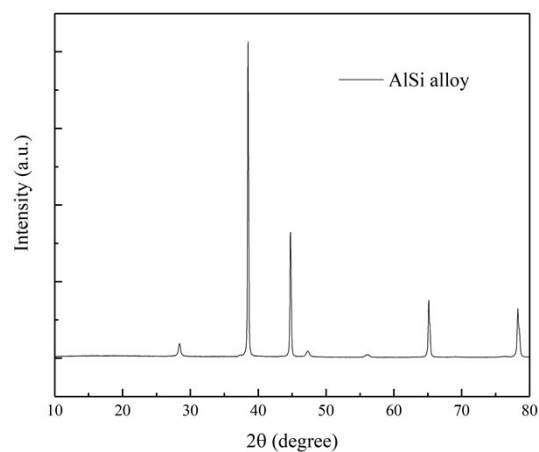

Fig. S1 XRD patterns of AlSi alloy

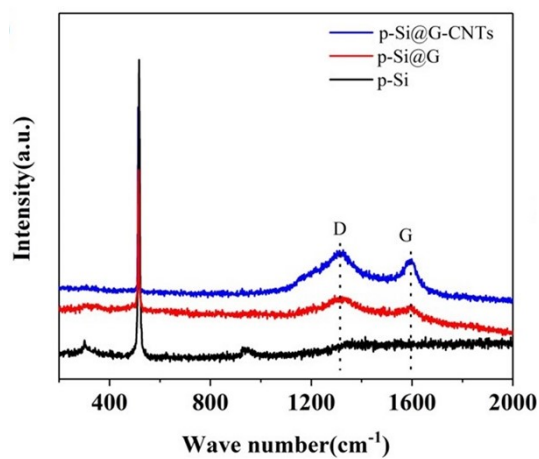

Fig. S2 Raman spectra of the p-Si, p-Si@G and p-Si@G-CNT electrode

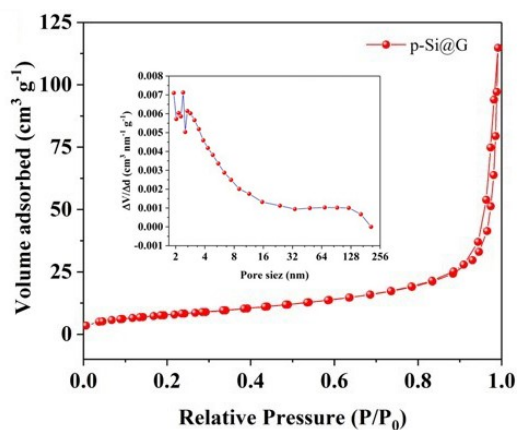

Fig. S3 Specific surface area of the p-Si@G composite. Inset is corresponding pore-size distribution.

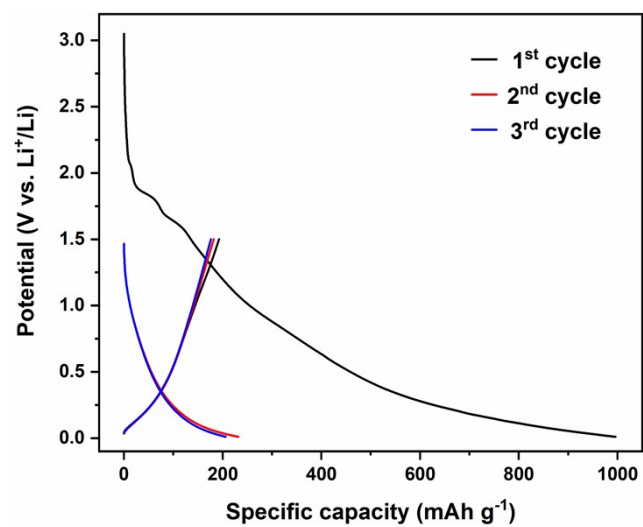

Fig. S4 The initial three charge-discharge profiles of the carbon nanotubes
